# Supplementary material for: Facile and Controllable Synthesis of Large-Area Monolayer WS2 Flakes Based on WO3 Precursor Drop-Casted Substrates by Chemical Vapor Deposition
Source: PubMed Central journal article supplement (PMC6523556; doi:10.3390/nano9040578), 2019-04-09
Supplement: nanomaterials-09-00578-s001.pdf [file nanomaterials-09-00578-s001.pdf]

# Supplementary material (SM)

Biao Shi <sup>1,†</sup>, Daming Zhou <sup>1,†</sup>, Shaoxi Fang <sup>1</sup>, Khouloud Djebbi <sup>1,2</sup>, Shuanglong Feng <sup>1</sup>, Hongquan Zhao <sup>1</sup>, Chaker Tlili <sup>1,\*</sup> and Deqiang Wang <sup>1,2,\*</sup>

- <sup>1</sup> Chongqing Key Lab of Multi-Scale Manufacturing Technology, Chongqing Institute of Green and Intelligent Technology, Chinese Academy of Sciences, Chongqing 400714, China; shibiao@cigit.ac.cn (B.S.); dmzhou@cigit.ac.cn (D.Z.); fangshaoxi@cigit.ac.cn (S.F.); khouloud@cigit.ac.cn (K.D.); fengshuanglong@cigit.ac.cn (S.F.); hqzhao@cigit.ac.cn (H.Z.)  
<sup>2</sup> University of Chinese Academy of Sciences, Beijing 100049, China  
\* Correspondence: chakertlili@cigit.ac.cn (C.T.); dqwang@cigit.ac.cn (D.W.)  
† These authors contributed equally to this work.

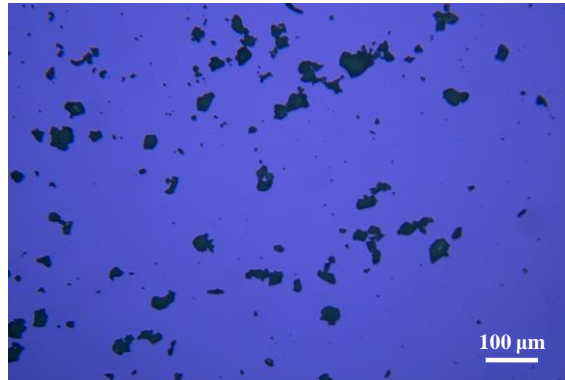

Figure S1. Optical image of powdered  $\text{WO}_3$  on  $\text{SiO}_2/\text{Si}$  substrate after the evaporation of ethanol.

Figure S1 shows the typical optical image of powdered  $\text{WO}_3$  on  $\text{SiO}_2/\text{Si}$  substrate after the evaporation of ethanol. Although the dimension of  $\text{WO}_3$  powders is ranged from a few to dozens of micrometers, relatively uniform distribution of powdered  $\text{WO}_3$  can be obtained.

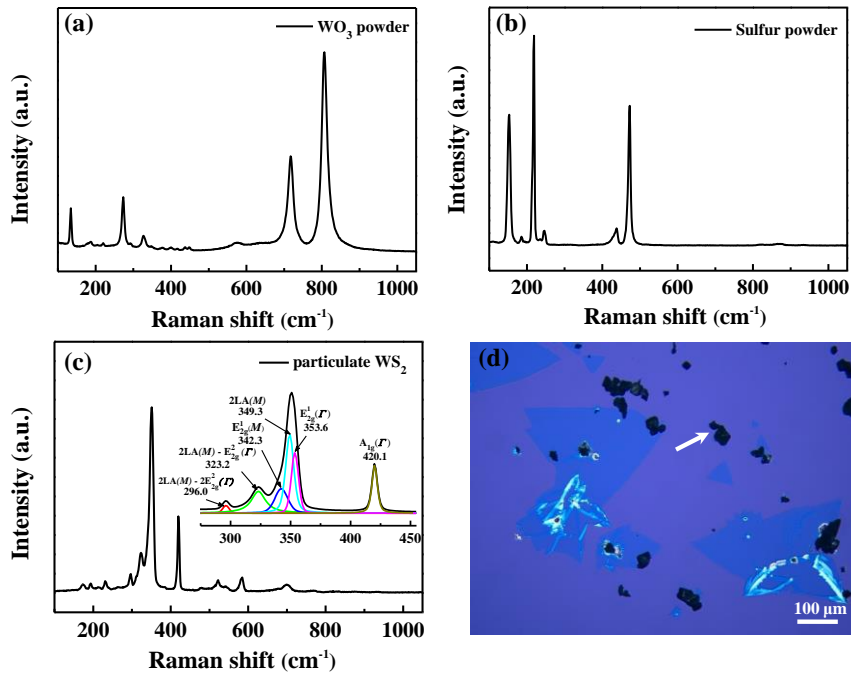

Figure S2. Raman spectra of the  $\text{WO}_3$  powder (a), sulfur powder (b) and particulate  $\text{WS}_2$  (c) marked with white arrow in Figure.S2 (d). Representative optical image of the as-grown  $\text{WS}_2$  sample on the bottom  $\text{SiO}_2/\text{Si}$  substrate that was drop-casted by  $\text{WO}_3$ -ethanol solution (d).

Figure S2 (a-c) show Raman spectra of the  $\text{WO}_3$ , sulfur powders and particulate materials grown on the bottom  $\text{SiO}_2/\text{Si}$  substrate. It can be clearly seen that the particulate materials shown in the optical image (d) only exhibit Raman modes related to  $\text{WS}_2$ , indicating that there are no tungsten oxide and sulfur inclusions in the particulate  $\text{WS}_2$ .

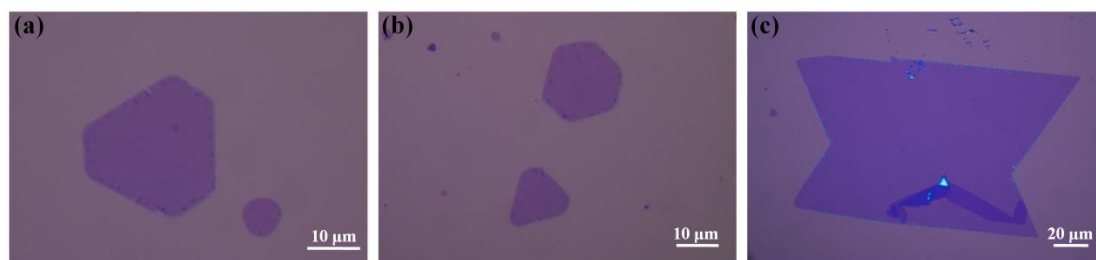

**Figure S3.** Optical images of as-grown  $\text{WS}_2$  flakes on  $\text{SiO}_2/\text{Si}$  substrate with various morphologies: Truncated-triangle (a), Hexagon (b), Butterfly (c).

For  $\text{WS}_2$ , its crystal structure belongs to  $P63/mmc$  space group, and its planar projection shows a perfect hexagonal lattice of sulfur atoms with interleaved tungsten atoms coordinated by sulfur in a trigonal prismatic arrangement [1, 2]. Generally, triangular monolayer  $\text{WS}_2$  domains have been commonly observed on the  $\text{SiO}_2/\text{Si}$  substrate. However, under such conditions various morphologies of  $\text{WS}_2$  with truncated-triangle, hexagon and butterfly shaped domains can occasionally be identified, as shown in Figure S3.

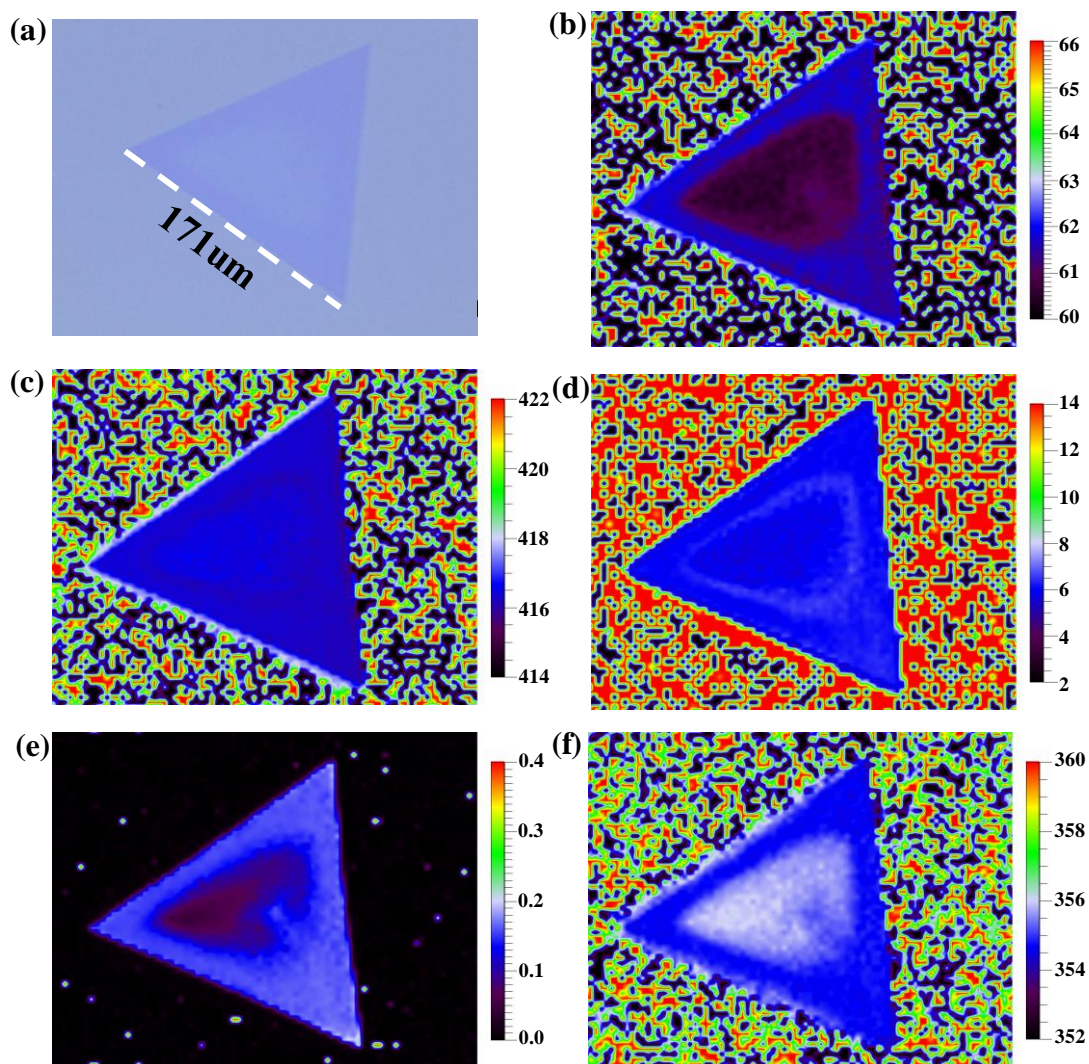

**Figure S4.** Optical image of the WS<sub>2</sub> flake with edge length of ~ 171 μm on SiO<sub>2</sub>/Si substrate (a). Raman mappings of the specific WS<sub>2</sub> sample: frequency difference between A<sub>1g</sub>(Γ) and E<sub>2g</sub><sup>1</sup>(Γ) modes (b); frequency (c), full width of half maximum (FWHM) (d) and normalized intensity (e) of A<sub>1g</sub>(Γ) mode; frequency of E<sub>2g</sub><sup>1</sup>(Γ) mode (f).

The optical image and Raman mapping results displayed in Figure S4 demonstrate that this smaller WS<sub>2</sub> triangle has similar features as the larger one previously observed in Figure 4a and the heterogeneity of FL emission is ascribed to the inhomogeneous tensile strain as well.

## References

- [1] Schutte, W. J.;Deboer, J. L.; Jellinek, F. CRYSTAL-STRUCTURES OF TUNGSTEN DISULFIDE AND DISELENIDE. *Journal of Solid State Chemistry* 1987, 70, 207–209.
- [2] Elias, A. L.;Perea-Lopez, N.;Castro-Beltran, A.;Berkdemir, A.;Lv, R. T.;Feng, S. M.;Long, A. D.;Hayashi, T.;Kim, Y. A.;Endo, M.;Gutierrez, H. R.;Pradhan, N. R.;Balicas, L.;Houk, T. E. M.;Lopez-Urias, F.;Terrones, H.; Terrones, M. Controlled Synthesis and Transfer of Large-Area WS<sub>2</sub> Sheets: From Single Layer to Few Layers. *ACS Nano* 2013, 7, 5235–5242.
